# Supplementary material for: Learning from microarray interlaboratory studies: measures of precision for gene expression
Source: PubMed Central journal article supplement (PMC2679054; doi:10.1186/1471-2164-10-153), 2009-04-08
Supplement: 1471-2164-10-153-S1.pdf [file 1471-2164-10-153-S1.pdf]

## Additional file 1: Summary of Notation

|                               |                                                                                                |
|-------------------------------|------------------------------------------------------------------------------------------------|
| $i$ .....                     | index of the “rounds” of the interlaboratory comparison program                                |
| $j$ .....                     | index of the participants in each round                                                        |
| $k$ .....                     | index of the replicate measurements made by each participant in each round                     |
| $N_m$ .....                   | number of replicate measurements; $N_m$ is always 3 for the data of this study                 |
| $N_p$ .....                   | total number of participants                                                                   |
| $N_{pi}$ .....                | number of participants in the $i^{\text{th}}$ round                                            |
| $N_s$ .....                   | total number of rounds                                                                         |
| $N_{sj}$ .....                | number of rounds the $j^{\text{th}}$ participant participated in                               |
| $N_t$ .....                   | total number of sets of replicate measurements over all rounds and participants                |
| $s(x_{ij})$ .....             | participant standard deviation for one set of replicate $X$ measurements                       |
| $s_L$ .....                   | between-participant precision of the measurement process                                       |
| $s_{Li}$ .....                | between-participant precision in the $i^{\text{th}}$ round                                     |
| $s_r$ .....                   | repeatability of the measurement process                                                       |
| $s_{ri}$ .....                | repeatability in the $i^{\text{th}}$ round                                                     |
| $s_{rj}$ .....                | repeatability of the $j^{\text{th}}$ participant                                               |
| $s_R$ .....                   | reproducibility of the measurement process                                                     |
| $s_{Ri}$ .....                | reproducibility in the $i^{\text{th}}$ round                                                   |
| $s_{I(T)j}$ .....             | intermediate precision over time for the $j^{\text{th}}$ participant                           |
| $s_{Wj}$ .....                | among-round precision for the $j^{\text{th}}$ participant                                      |
| $X$ .....                     | a particular expression measure; here, $\log_2(\text{MAS5})$                                   |
| $x_{ijk}$ .....               | $k^{\text{th}}$ $X$ measurement by $j^{\text{th}}$ participant in $i^{\text{th}}$ round        |
| $\bar{x}_{ij}$ .....          | average of replicate measurements for the $j^{\text{th}}$ participant in $i^{\text{th}}$ round |
| $\bar{\bar{x}}_i$ .....       | average of averages in the $i^{\text{th}}$ round                                               |
| $\bar{\bar{x}}_j$ .....       | average of averages for the $j^{\text{th}}$ participant over all rounds                        |
| $\bar{\bar{\bar{x}}}$ .....   | grand average of averages over all rounds and participants                                     |
| $\langle \cdot \rangle$ ..... | mean or median of a list of independent values                                                 |
| $\{ \cdot, \cdot \}$ .....    | set of two or more identically ordered lists                                                   |
