# Supplementary material for: Learning from microarray interlaboratory studies: measures of precision for gene expression
Source: PubMed Central journal article supplement (PMC2679054; doi:10.1186/1471-2164-10-153), 2009-04-08
Supplement: 1471-2164-10-153-S2.pdf [file 1471-2164-10-153-S2.pdf]

Additional file 2: Data and precision calculations for RNA Mix 1, exemplar probeset AFX\_Rat\_Hexokinase\_5\_at.  
All estimates are for log<sub>2</sub>-transformed MAS5 signals.

| Code | Round 1   |           |             |                |          | Round 2   |           |             |                |          | Round 3   |           |             |                |          | Between-Round |             |          |           |             |
|------|-----------|-----------|-------------|----------------|----------|-----------|-----------|-------------|----------------|----------|-----------|-----------|-------------|----------------|----------|---------------|-------------|----------|-----------|-------------|
|      | $x_{1jA}$ | $x_{1jB}$ | $x_{1jC}$   | $\bar{x}_{1j}$ | $s_{1j}$ | $x_{2jA}$ | $x_{2jB}$ | $x_{2jC}$   | $\bar{x}_{2j}$ | $s_{2j}$ | $x_{3jA}$ | $x_{3jB}$ | $x_{3jC}$   | $\bar{x}_{3j}$ | $s_{3j}$ | $N_{sj}$      | $\bar{x}_j$ | $s_{rj}$ | $s_{wj}$  | $s_{I(T)j}$ |
| 1A   | 9.714     | 9.500     | 9.687       | 9.634          | 0.117    |           |           |             |                |          |           |           |             |                |          | 1             | 9.634       | 0.117    | na        | na          |
| 1B   |           |           |             |                |          | 9.829     | 9.965     | 9.946       | 9.913          | 0.073    | 5.060     | 2.591     | 3.822       | 3.824          | 1.234    | 2             | 6.869       | 0.874    | 4.276     | 4.364       |
| 2    |           |           |             |                |          | 9.933     | 9.703     | 9.893       | 9.843          | 0.123    | 9.632     | 9.699     | 9.662       | 9.664          | 0.034    | 2             | 9.754       | 0.090    | 0.115     | 0.146       |
| 3    |           |           |             |                |          | 8.772     | 8.703     | 8.860       | 8.778          | 0.078    | 9.235     | 9.489     | 9.349       | 9.358          | 0.127    | 2             | 9.068       | 0.106    | 0.405     | 0.419       |
| 4    | 4.585     | 4.408     | 5.438       | 4.810          | 0.551    | 5.641     | 4.416     | 5.649       | 5.235          | 0.710    | 5.516     | 5.334     | 2.658       | 4.503          | 1.600    | 3             | 4.849       | 1.060    | 0.000     | 1.060       |
| 5    | 8.434     | 8.279     | 7.950       | 8.221          | 0.247    | 9.216     | 9.187     | 8.665       | 9.023          | 0.310    | 7.454     | 6.881     | 7.903       | 7.413          | 0.512    | 3             | 8.219       | 0.374    | 0.776     | 0.861       |
| 6    | 9.806     | 9.687     | 9.105       | 9.533          | 0.375    | 9.263     | 8.944     | 9.202       | 9.136          | 0.169    | 9.784     | 9.756     | 9.790       | 9.777          | 0.018    | 3             | 9.482       | 0.238    | 0.293     | 0.377       |
| 7    | 5.661     | 6.118     | 5.956       | 5.912          | 0.232    | 6.422     | 6.366     | 6.385       | 6.391          | 0.029    | 8.058     | 7.845     | 8.096       | 8.000          | 0.135    | 3             | 6.768       | 0.156    | 1.090     | 1.101       |
| 8    | 3.782     | 3.422     | 4.678       | 3.961          | 0.647    | 2.098     | 2.300     | 1.598       | 1.999          | 0.361    | 4.523     | 2.979     | 2.270       | 3.257          | 1.152    | 3             | 3.072       | 0.791    | 0.883     | 1.185       |
| 9    | 5.990     | 6.948     | 6.685       | 6.541          | 0.495    | 4.615     | 5.090     | 3.390       | 4.365          | 0.877    | 4.005     | 3.131     | 4.295       | 3.810          | 0.606    | 3             | 4.906       | 0.679    | 1.389     | 1.546       |
| 10   | 9.234     | 8.007     | 7.497       | 8.246          | 0.893    |           |           |             |                |          |           |           |             |                |          | 1             | 8.246       | 0.893    | na        | na          |
| 11   | 8.898     | 8.664     | 8.886       | 8.816          | 0.132    | 8.465     | 8.734     | 8.656       | 8.619          | 0.138    |           |           |             |                |          | 2             | 8.717       | 0.135    | 0.116     | 0.178       |
| 12   | 8.977     | 8.494     | 8.690       | 8.720          | 0.243    | 9.342     | 9.342     | 9.016       | 9.233          | 0.188    | 9.275     | 9.291     | 9.298       | 9.288          | 0.012    | 3             | 9.081       | 0.178    | 0.296     | 0.345       |
| 13   | 9.333     | 9.186     | 9.108       | 9.209          | 0.114    | 8.947     | 8.830     | 9.041       | 8.940          | 0.106    |           |           |             |                |          | 2             | 9.074       | 0.110    | 0.180     | 0.211       |
| 14   | 9.301     | 9.343     | 9.101       | 9.248          | 0.129    | 9.155     | 9.146     | 9.053       | 9.118          | 0.056    | 9.607     | 9.574     | 9.556       | 9.579          | 0.026    | 3             | 9.315       | 0.083    | 0.233     | 0.247       |
| 15   |           |           |             |                |          | 9.310     | 9.330     | 9.292       | 9.311          | 0.019    | 9.138     | 9.373     | 9.341       | 9.284          | 0.127    | 2             | 9.297       | 0.091    | 0.000     | 0.091       |
| 16   | 9.959     | 9.644     | 9.786       | 9.796          | 0.158    | 9.765     | 9.817     | 9.555       | 9.712          | 0.139    | 9.631     | 9.717     | 9.546       | 9.631          | 0.085    | 3             | 9.713       | 0.131    | 0.034     | 0.135       |
| 17   |           |           |             |                |          | 10.080    | 10.140    | 10.271      | 10.164         | 0.098    | 10.445    | 10.362    | 10.149      | 10.319         | 0.153    | 2             | 10.241      | 0.128    | 0.081     | 0.152       |
| 18   |           |           |             |                |          |           |           |             |                |          | 9.192     | 9.085     | 8.944       | 9.074          | 0.124    | 1             | 9.074       | 0.124    | na        | na          |
|      |           |           | $N_{p1}$    | 13             |          |           |           | $N_{p2}$    | 16             |          |           |           | $N_{p3}$    | 15             |          | 44            |             |          | $N_t$     |             |
|      |           |           | $\bar{x}_1$ | 7.896          |          |           |           | $\bar{x}_2$ | 8.111          |          |           |           | $\bar{x}_3$ | 7.785          |          |               | 7.937       |          | $\bar{x}$ |             |
|      |           |           | $s_{r1}$    |                | 0.408    |           |           | $s_{r2}$    |                | 0.321    |           |           | $s_{r3}$    |                | 0.640    |               |             |          | 0.476     | $s_r$       |
|      |           |           | $s_{L1}$    | 1.931          |          |           |           | $s_{L2}$    | 2.340          |          |           |           | $s_{L3}$    | 2.539          |          |               |             |          | 2.300     | $s_L$       |
|      |           |           | $s_{R1}$    | 1.973          |          |           |           | $s_{R2}$    | 2.362          |          |           |           | $s_{R3}$    | 2.618          |          |               |             |          | 2.348     | $s_R$       |
