# Supplementary material for: Learning from microarray interlaboratory studies: measures of precision for gene expression
Source: PubMed Central journal article supplement (PMC2679054; doi:10.1186/1471-2164-10-153), 2009-04-08
Supplement: 1471-2164-10-153-S3.pdf [file 1471-2164-10-153-S3.pdf]

Additional file 3: Summary of method-related precision estimates for four exemplar probesets.  
 All estimates are for  $\log_2$ -transformed MAS5 signals.

| Statistic         | a) Mix2 G2_1379568_at | b) Mix1 G1_1395685_at | c) Mix1 G1_1371165_a_at | d) Mix1 AFFX_Rat_Hexokinase_5_at |
|-------------------|-----------------------|-----------------------|-------------------------|----------------------------------|
| $N_{p1}$          | 13                    | 13                    | 13                      | 13                               |
| $\bar{\bar{x}}_1$ | 7.801                 | 6.309                 | 6.355                   | 7.896                            |
| $s_{r1}$          | 0.108                 | 1.236                 | 0.717                   | 0.408                            |
| $s_{L1}$          | 0.202                 | 0.285                 | 1.049                   | 1.931                            |
| $s_{R1}$          | 0.228                 | 1.269                 | 1.271                   | 1.973                            |
| $N_{p2}$          | 16                    | 16                    | 16                      | 16                               |
| $\bar{\bar{x}}_2$ | 7.780                 | 6.328                 | 6.590                   | 8.111                            |
| $s_{r2}$          | 0.182                 | 1.255                 | 0.567                   | 0.321                            |
| $s_{L2}$          | 0.129                 | 0.172                 | 1.102                   | 2.340                            |
| $s_{R2}$          | 0.223                 | 1.267                 | 1.239                   | 2.362                            |
| $N_{p3}$          | 15                    | 15                    | 15                      | 15                               |
| $\bar{\bar{x}}_3$ | 7.817                 | 6.202                 | 6.956                   | 7.785                            |
| $s_{r3}$          | 0.189                 | 0.957                 | 0.844                   | 0.640                            |
| $s_{L3}$          | 0.071                 | 0.000                 | 0.910                   | 2.539                            |
| $s_{R3}$          | 0.202                 | 0.957                 | 1.241                   | 2.618                            |
| $N_t$             | 44                    | 44                    | 44                      | 44                               |
| $\bar{\bar{x}}$   | 7.799                 | 6.279                 | 6.645                   | 7.937                            |
| $s_r$             | 0.166                 | 1.156                 | 0.715                   | 0.476                            |
| $s_L$             | 0.140                 | 0.186                 | 1.024                   | 2.300                            |
| $s_R$             | 0.218                 | 1.171                 | 1.249                   | 2.348                            |
