# Supplementary material for: Learning from microarray interlaboratory studies: measures of precision for gene expression
Source: PubMed Central journal article supplement (PMC2679054; doi:10.1186/1471-2164-10-153), 2009-04-08
Supplement: 1471-2164-10-153-S4.pdf [file 1471-2164-10-153-S4.pdf]

Additional file 4: Summary of participant-related precision estimates for four exemplar probesets.  
 All estimates are for  $\log_2$ -transformed MAS5 signals.

| Code | $N_{S_j}$ | a) Mix2<br>G2_1379568_at |          |          |             | b) Mix1<br>G1_1395685_at |          |          |             | c) Mix1<br>G1_1371165_a_at |          |          |             | d) Mix1<br>AFFX_Rat_Hexokinase_5_at |          |          |             |
|------|-----------|--------------------------|----------|----------|-------------|--------------------------|----------|----------|-------------|----------------------------|----------|----------|-------------|-------------------------------------|----------|----------|-------------|
|      |           | $\bar{x}_j$              | $s_{rj}$ | $s_{wj}$ | $s_{I(T)j}$ | $\bar{x}_j$              | $s_{rj}$ | $s_{wj}$ | $s_{I(T)j}$ | $\bar{x}_j$                | $s_{rj}$ | $s_{wj}$ | $s_{I(T)j}$ | $\bar{x}_j$                         | $s_{rj}$ | $s_{wj}$ | $s_{I(T)j}$ |
| 1A   | 1         | 7.710                    | 0.110    | na       | na          | 6.933                    | 1.033    | na       | na          | 7.308                      | 0.555    | na       | na          | 9.634                               | 0.117    | na       | na          |
| 1B   | 2         | 7.881                    | 0.120    | 0.000    | 4.364       | 5.307                    | 0.799    | 0.000    | 4.364       | 6.749                      | 1.679    | 0.745    | 4.364       | 6.869                               | 0.874    | 4.276    | 4.364       |
| 2    | 2         | 7.885                    | 0.089    | 0.090    | 0.146       | 5.942                    | 1.265    | 0.000    | 0.146       | 7.309                      | 0.247    | 0.000    | 0.146       | 9.754                               | 0.090    | 0.115    | 0.146       |
| 3    | 2         | 7.654                    | 0.047    | 0.000    | 0.419       | 6.144                    | 0.620    | 0.780    | 0.419       | 7.466                      | 0.688    | 0.000    | 0.419       | 9.068                               | 0.106    | 0.405    | 0.419       |
| 4    | 3         | 7.596                    | 0.109    | 0.311    | 1.060       | 6.108                    | 1.490    | 0.000    | 1.060       | 5.787                      | 0.584    | 0.000    | 1.060       | 4.849                               | 1.060    | 0.000    | 1.060       |
| 5    | 3         | 7.753                    | 0.296    | 0.000    | 0.861       | 6.236                    | 1.299    | 0.000    | 0.861       | 6.035                      | 0.774    | 0.407    | 0.861       | 8.219                               | 0.374    | 0.776    | 0.861       |
| 6    | 3         | 7.682                    | 0.159    | 0.171    | 0.377       | 6.294                    | 1.896    | 0.000    | 0.377       | 7.991                      | 0.382    | 0.436    | 0.377       | 9.482                               | 0.238    | 0.293    | 0.377       |
| 7    | 3         | 7.733                    | 0.128    | 0.000    | 1.101       | 6.867                    | 1.178    | 0.393    | 1.101       | 5.960                      | 0.627    | 1.104    | 1.101       | 6.768                               | 0.156    | 1.090    | 1.101       |
| 8    | 3         | 7.788                    | 0.189    | 0.000    | 1.185       | 6.149                    | 0.688    | 0.000    | 1.185       | 4.982                      | 0.734    | 0.701    | 1.185       | 3.072                               | 0.791    | 0.883    | 1.185       |
| 9    | 3         | 7.949                    | 0.134    | 0.140    | 1.546       | 6.359                    | 0.653    | 0.000    | 1.546       | 5.159                      | 0.244    | 0.071    | 1.546       | 4.906                               | 0.679    | 1.389    | 1.546       |
| 10   | 1         | 7.865                    | 0.119    | na       | na          | 6.503                    | 0.384    | na       | na          | 7.007                      | 1.428    | na       | na          | 8.246                               | 0.893    | na       | na          |
| 11   | 2         | 7.816                    | 0.115    | 0.239    | 0.178       | 7.073                    | 0.419    | 0.000    | 0.178       | 6.312                      | 0.867    | 0.331    | 0.178       | 8.717                               | 0.135    | 0.116    | 0.178       |
| 12   | 3         | 8.092                    | 0.114    | 0.000    | 0.345       | 6.024                    | 1.249    | 0.000    | 0.345       | 6.055                      | 0.655    | 1.162    | 0.345       | 9.081                               | 0.178    | 0.296    | 0.345       |
| 13   | 2         | 7.822                    | 0.114    | 0.000    | 0.211       | 6.652                    | 1.526    | 1.225    | 0.211       | 6.474                      | 0.447    | 0.727    | 0.211       | 9.074                               | 0.110    | 0.180    | 0.211       |
| 14   | 3         | 7.805                    | 0.134    | 0.000    | 0.247       | 6.937                    | 0.883    | 0.000    | 0.247       | 7.873                      | 0.464    | 0.000    | 0.247       | 9.315                               | 0.083    | 0.233    | 0.247       |
| 15   | 2         | 7.678                    | 0.058    | 0.063    | 0.091       | 6.523                    | 0.608    | 1.153    | 0.091       | 7.388                      | 0.820    | 0.920    | 0.091       | 9.297                               | 0.091    | 0.000    | 0.091       |
| 16   | 3         | 7.723                    | 0.211    | 0.000    | 0.135       | 5.692                    | 1.189    | 0.000    | 0.135       | 7.665                      | 0.541    | 0.023    | 0.135       | 9.713                               | 0.131    | 0.034    | 0.135       |
| 17   | 2         | 7.858                    | 0.325    | 0.113    | 0.152       | 5.421                    | 1.707    | 0.000    | 0.152       | 7.202                      | 0.569    | 0.577    | 0.152       | 10.241                              | 0.128    | 0.081    | 0.152       |
| 18   | 1         | 8.040                    | 0.244    | na       | na          | 6.728                    | 0.380    | na       | na          | 7.767                      | 0.722    | na       | na          | 9.074                               | 0.124    | na       | na          |
